# Supplementary material for: A high work function anode interfacial layer via mild temperature thermal decomposition of a C60F36 thin film on ITO
Source: Royal Society of Chemistry journal article supplement (doi:10.1039/c2tc00110a), 2012-12-13
Supplement: c2tc00110a.pdf [file c2tc00110a.pdf]

## **Supplementary Information: *Journal of Materials Chemistry***

### **High work function anode interfacial layer via mild temperature thermal decomposition of C<sub>60</sub>F<sub>36</sub> thin film on ITO**

Hong Ying Mao,<sup>a</sup> Rui Wang,<sup>b</sup> Jian Qiang Zhong,<sup>b</sup> Shu Zhong,<sup>a</sup> Jia Dan  
Lin,<sup>b</sup> Xi Zu Wang,<sup>c</sup> Zhi Kuan Chen,<sup>c</sup> and Wei Chen<sup>\*a,b</sup>

<sup>a</sup> Department of Chemistry, National University of Singapore, 3 Science Drive 3,  
Singapore 117543

<sup>b</sup> Department of Physics, National University of Singapore, 3 Science Drive 2,  
Singapore 117542

<sup>c</sup> Institute of Material Research & Engineering, 3 Research Link, 117602, Singapore

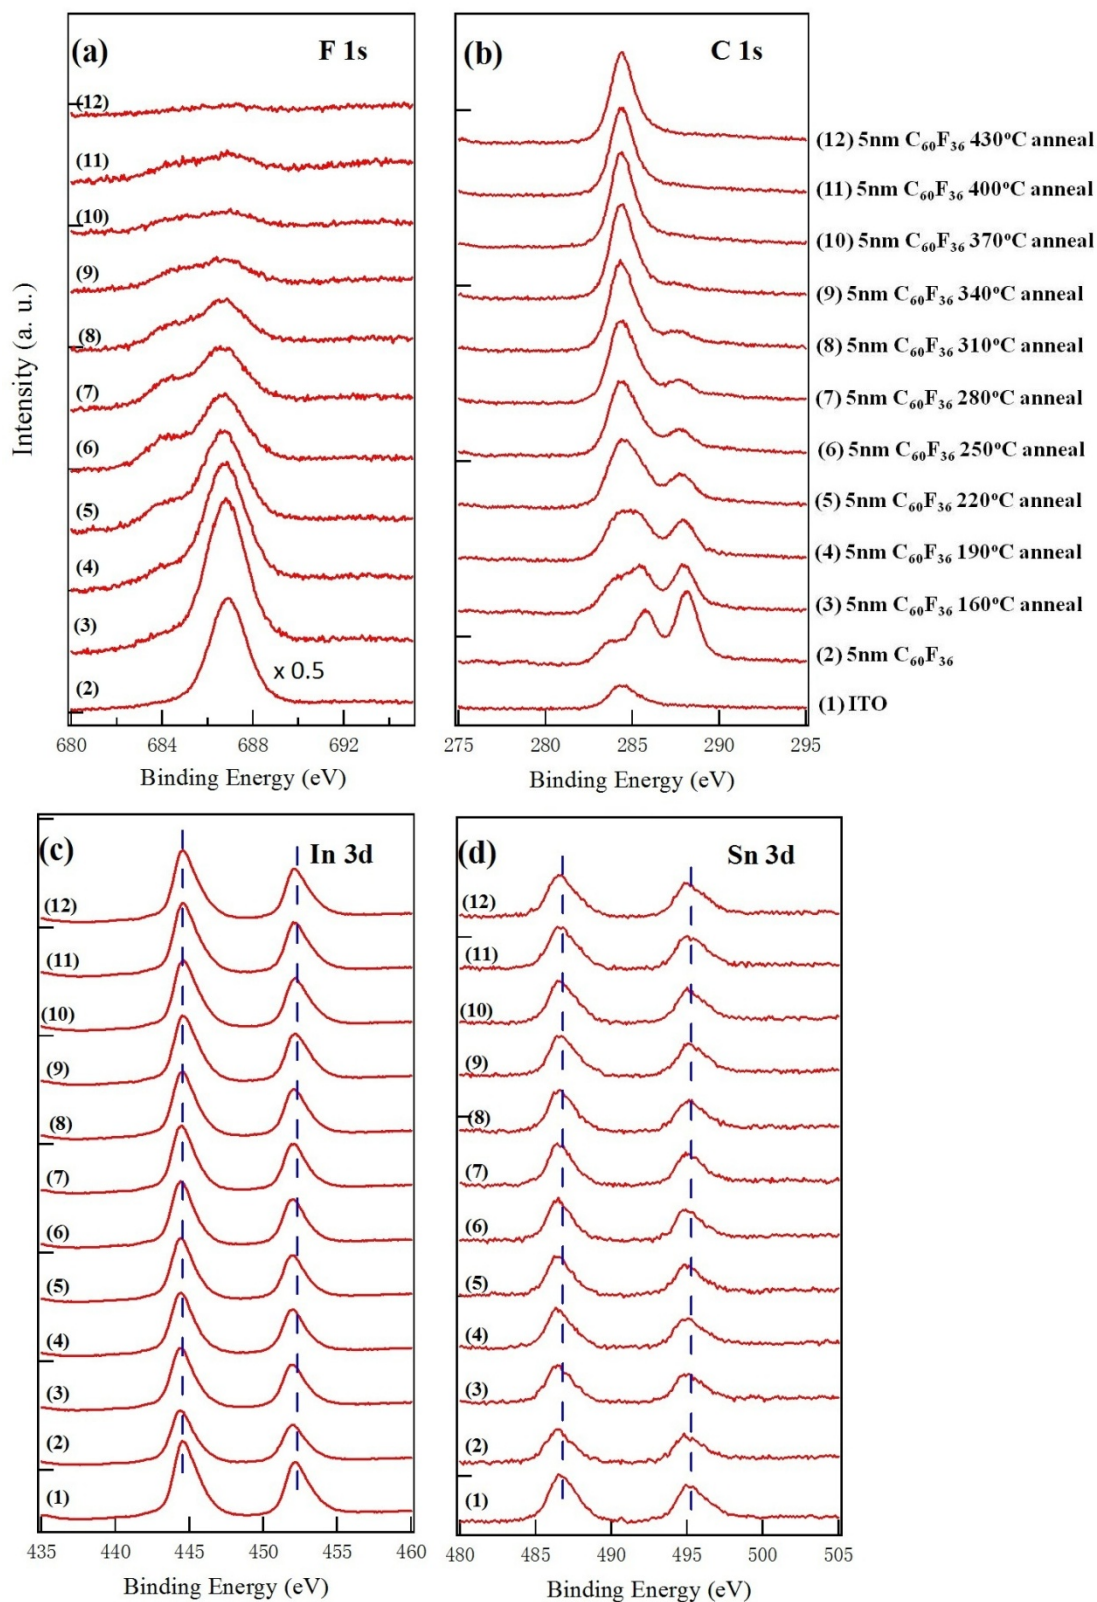

Figure S1. XPS spectra of (a) F 1s, (b) C 1s, (c) In 3d, and (d) Sn 3d core level evolution for 5.0 nm  $C_{60}F_{36}$  thin film on ITO with increasing anneal temperature.
